# Supplementary material
Source: PubMed Central journal article supplement (PMC2861569)
Supplement: NIHMS96660-supplement-supplement_1.pdf [file NIHMS96660-supplement-supplement_1.pdf]

**Supplementary Table 1. Mean, Median, and Standard Error of Log IgE for Cases Taking Various Medications at the Time of Blood Draw, San Francisco Bay Area Adult Glioma Study (2001-2005)**

| Medication Category                                         | Code     | <u>Log IgE (Cases Only)</u> |      |        |           | <u>Log IgE (Controls Only)</u> |      |        |           |
|-------------------------------------------------------------|----------|-----------------------------|------|--------|-----------|--------------------------------|------|--------|-----------|
|                                                             |          | N                           | Mean | Median | Std Error | N                              | Mean | Median | Std Error |
| All participants who gave blood                             |          |                             |      |        |           |                                |      |        |           |
| Chemotherapy drug or strong immunosuppressant (all)         | 1        | 62                          | 2.9  | 2.8    | 0.2       | 3                              | 2.6  | 2.9    | 0.5       |
| Temodar (also included #1 above)                            | temodar  | 57                          | 3.0  | 2.9    | 0.2       | 0                              | NA   | NA     | NA        |
| HIV/AIDS drug                                               | 2        | 1                           | 3.1  | 3.1    | NA        | 3                              | 1.9  | 1.9    | 0.7       |
| Antibiotic or Antiviral with some immunologic effects       | 3        | 33                          | 3.1  | 2.9    | 0.3       | 21                             | 3.3  | 2.9    | 0.4       |
| NSAID drug, antiInflammatory                                | 4        | 39                          | 3.2  | 3.6    | 0.2       | 69                             | 3.5  | 3.5    | 0.2       |
| Antihistamine, antileukotriene, or other allergy medication | 5        | 18                          | 4.0  | 3.9    | 0.4       | 23                             | 3.5  | 3.8    | 0.4       |
| Identity of drug is unclear, so no judgement was made       | 6        | 36                          | 3.4  | 3.4    | 0.2       | 23                             | 3.0  | 3.0    | 0.3       |
| Drug likely not affecting immune system                     | 7        | 351                         | 3.3  | 3.2    | 0.1       | 238                            | 3.4  | 3.4    | 0.1       |
| Steroid medication (not inhaled)                            | 8        | 166                         | 3.3  | 3.1    | 0.1       | 4                              | 3.6  | 3.6    | 0.8       |
| Dexamethasone/Decadron only (also included in #8 above)     | decadron | 164                         | 3.3  | 3.1    | 0.1       | 0                              | NA   | NA     | NA        |
| Hormone replacement therapy                                 | 9        | 11                          | 2.9  | 2.7    | 0.5       | 34                             | 3.5  | 3.8    | 0.3       |
| Oral contraceptives                                         | 10       | 6                           | 4.3  | 3.9    | 0.7       | 22                             | 3.4  | 3.4    | 0.4       |
| Inhaled steroids                                            | 11       | 7                           | 4.1  | 3.8    | 0.8       | 16                             | 3.8  | 3.9    | 0.3       |
| Inhaled beta 2 agonists or anti-muscarinic Ach recept       | 12       | 8                           | 4.0  | 4.1    | 0.7       | 11                             | 4.1  | 4.4    | 0.3       |
| Topical antibiotics                                         | 13       | 5                           | 2.7  | 3.0    | 0.5       | 0                              | NA   | NA     | NA        |
| Inhaled antiInflammatory                                    | 14       | 0                           | NA   | NA     | NA        | 2                              | 4.2  | 4.2    | 0.3       |
| Topical corticosteroids                                     | 15       | 3                           | 3.5  | 3.7    | 1.3       | 1                              | 3.8  | 3.8    |           |
| TNF alpha inhibitor                                         | 16       | 1                           | 3.9  | 3.9    | NA        | 0                              | NA   | NA     | NA        |
| INF inducer                                                 | 17       | 1                           | 5.1  | 5.1    | NA        | 0                              | NA   | NA     | NA        |

**Supplementary Table 2. Case-Control Odds Ratios for Total IgE (continuous) Stratified by Series, Age and Temodar Use, San Francisco Bay Area Adult Glioma Study (2001-2005)**

| <b>Series 2</b>                                                                          |         |           |         |                    |                       |         |                    |                        |         |                    |
|------------------------------------------------------------------------------------------|---------|-----------|---------|--------------------|-----------------------|---------|--------------------|------------------------|---------|--------------------|
| Age group                                                                                | Control | Case      | p-value | odds ratio*        |                       |         |                    |                        |         |                    |
| All                                                                                      | 289     | 226       | 0.000   | 0.73 (0.64 - 0.84) |                       |         |                    |                        |         |                    |
| <52                                                                                      | 91      | 117       | 0.014   | 0.76 (0.61 - 0.95) |                       |         |                    |                        |         |                    |
| 53-65                                                                                    | 92      | 64        | 0.000   | 0.58 (0.45 - 0.76) |                       |         |                    |                        |         |                    |
| >=66                                                                                     | 106     | 45        | 0.232   | 0.87 (0.69 - 1.10) |                       |         |                    |                        |         |                    |
| <b>Series 3</b>                                                                          |         |           |         |                    |                       |         |                    |                        |         |                    |
| Age group                                                                                | Control | All Cases | p-value | odds ratio*        | Cases w/o temodar use | p-value | odds ratio*        | Cases with temodar use | p-value | odds ratio*        |
| All                                                                                      | 470     | 393       | 0.015   | 0.89 (0.82 - 0.98) | 134                   | 0.847   | 0.99 (0.86 - 1.13) | 224                    | <0.001  | 0.82 (0.73 - 0.91) |
| <=52                                                                                     | 203     | 196       | 0.141   | 0.90 (0.79 - 1.03) | 76                    | 0.703   | 1.04 (0.86 - 1.24) | 103                    | 0.007   | 0.79 (0.67 - 0.94) |
| 53-65                                                                                    | 141     | 128       | 0.020   | 0.82 (0.69 - 0.97) | 31                    | 0.680   | 0.94 (0.70 - 1.26) | 83                     | 0.015   | 0.79 (0.65 - 0.96) |
| >=66                                                                                     | 126     | 69        | 0.748   | 0.97 (0.80 - 1.17) | 27                    | 0.704   | 0.94 (0.70 - 1.27) | 38                     | 0.386   | 0.90 (0.71 - 1.14) |
| *Odds ratios are for each unit of increase in the natural log of the total IgE level.    |         |           |         |                    |                       |         |                    |                        |         |                    |
| *Odds ratios adjusted for age, gender, ethnicity, college education and smoking history. |         |           |         |                    |                       |         |                    |                        |         |                    |

**Supplementary Table 3. Case-Control Odds Ratios for Total IgE (continuous) Stratified by Series, Time Between Diagnosis and Blood Draw and Temodar Use, San Francisco Bay Area Adult Glioma Study (2001-2005)**

|                                         | Series 2 |             |      |             |         | Series 3           |             |      |             |         |                    |                    |                    |
|-----------------------------------------|----------|-------------|------|-------------|---------|--------------------|-------------|------|-------------|---------|--------------------|--------------------|--------------------|
|                                         | Control  |             | Case |             | p-value | Control            |             | Case |             | p-value | OR (95% CI)*       |                    |                    |
|                                         | N        | Med ln(IgE) | N    | Med ln(IgE) |         | N                  | Med ln(IgE) | N    | Med ln(IgE) |         |                    |                    |                    |
| <b>All cases and controls</b>           |          |             |      |             |         |                    |             |      |             |         |                    |                    |                    |
| All                                     | 289      | 3.46        | 226  | 2.93        | <0.001  | 0.73 (0.64 - 0.84) | 470         | 3.46 | 393         | 3.2     | 0.015              | 0.89 (0.82 - 0.98) |                    |
| No Temodar given                        |          |             |      |             |         |                    |             | 134  | 3.36        | 0.847   | 0.99 (0.86 - 1.13) |                    |                    |
| Treated with Temodar                    |          |             |      |             |         |                    |             | 224  | 2.97        | <0.001  | 0.82 (0.73 - 0.91) |                    |                    |
| <b>Blood drawn ≤30 days after dx</b>    |          |             |      |             |         |                    |             |      |             |         |                    |                    |                    |
| All                                     |          |             |      |             |         |                    | 470         | 3.46 | 100         | 3.79    | 0.070              | 1.15 (0.99 - 1.33) |                    |
| No Temodar given                        |          |             |      |             |         |                    |             |      | 36          | 3.72    | 0.137              | 1.19 (0.95 - 1.50) |                    |
| Treated with Temodar                    |          |             |      |             |         |                    |             |      | 56          | 3.79    | 0.251              | 1.12 (0.92 - 1.35) |                    |
| <b>Blood drawn 31-60 days after dx</b>  |          |             |      |             |         |                    |             |      |             |         |                    |                    |                    |
| All                                     | 289      | 3.46        | 11   | 2.07        | 0.005   | 0.43 (0.24 - 0.77) | 470         | 3.46 | 75          | 3.22    | 0.086              | 0.86 (0.72 - 1.02) |                    |
| No Temodar given                        |          |             |      |             |         |                    |             |      | 27          | 3.22    | 0.209              | 0.84 (0.63 - 1.11) |                    |
| Treated with Temodar                    |          |             |      |             |         |                    |             |      | 43          | 2.98    | 0.261              | 0.88 (0.71 - 1.10) |                    |
| <b>Blood drawn &gt;60 days after dx</b> |          |             |      |             |         |                    |             |      |             |         |                    |                    |                    |
| All                                     | 289      | 3.46        | 215  | 2.97        | <0.001  | 0.75 (0.65 - 0.85) | 470         | 3.46 | 218         | 2.96    | <0.001             | 0.80 (0.71 - 0.89) |                    |
| No Temodar given                        |          |             |      |             |         |                    |             |      | 470         | 71      | 3.18               | 0.547              | 0.95 (0.80 - 1.13) |
| Treated with Temodar                    |          |             |      |             |         |                    |             |      | 470         | 125     | 2.61               | <0.001             | 0.68 (0.59 - 0.78) |

\*Odds ratios are for each unit of increase in the natural log of the total IgE level.

\*Odds ratios adjusted for age, gender, ethnicity, college education and smoking history.

**Supplementary Table 4:** IgE and Flow Cytometry cell counts for serial blood specimens obtained over a one month period for a glioblastoma patient on temozolomide treatment, days 1-5 on, days 6-28 off.

| Day in treatment cycle | IgE  | CD8 <sup>1</sup> | CD4+Foxp3 <sup>2</sup> | CD4 <sup>1</sup> |
|------------------------|------|------------------|------------------------|------------------|
| day 0                  | 30.9 | 17.29            | 6.36                   | 21.15            |
| day 3                  | 29.4 | 25.87            | 4.68                   | 21.22            |
| day19                  | 30.9 | 17.13            | 9.38                   | 17.45            |
| day 23                 | 28.2 | 26.53            | 5.78                   | 22.67            |
| day 25                 | 32.2 | 13.71            | 6.39                   | 14.79            |
| day 26                 | 32.9 | 15.36            | 6.68                   | 18.77            |

Cells were gated on <sup>1</sup>total lymphocytes, or <sup>2</sup>total CD4+ cells
